# Supplementary material for: Structural mass spectrometry of tissue extracts to distinguish cancerous and non-cancerous breast diseases
Source: Royal Society of Chemistry journal article supplement (doi:10.1039/c4mb00250d), 2014-09-02
Supplement: c4mb00250d1.xlsx [file c4mb00250d1.xlsx]

## Sheet: Hines_et_al_Mol_BioSys
Primary ID	File Text	Sample Group	303.049	189.082	395.001	113.09	151.035	160.177	173.125	148.106	267.071	86.1572	365.075	299	527.049	388.988	130.12	215.16	528.052	497.154	277.117	381.09	142.109	238.987	274.08	152.107	239.181	377.115	135.085	115.109	137.099	804.84	124.108	370.261	175.066	269.028	138.101	132.128	159.137	180.949	260.899	99.0399	365.139	120.138	114.959	110.094	94.1008	272.001	153.104
Mass			303.049	189.082	395.001	113.09	151.035	160.177	173.125	148.106	267.071	86.1572	365.075	299	527.049	388.988	130.12	215.16	528.052	497.154	277.117	381.09	142.109	238.987	274.08	152.107	239.181	377.115	135.085	115.109	137.099	804.84	124.108	370.261	175.066	269.028	138.101	132.128	159.137	180.949	260.899	99.0399	365.139	120.138	114.959	110.094	94.1008	272.001	153.104
Retention Time			4.03029	4.00838	3.38662	3.39662	3.38662	2.26165	4.02592	1.55685	3.38658	5.3131	1.63112	3.39158	1.71104	1.34647	4.69572	5.19705	1.71102	7.57432	2.2117	6.76773	4.68255	3.39658	1.62237	3.92973	5.4555	5.02851	3.92969	4.67388	2.68178	6.39007	2.50885	8.48953	9.07387	6.76772	2.68613	4.67387	4.67394	1.4494	1.41885	1.59619	6.76765	4.26687	1.4276	2.6774	2.6774	1.48505	3.9385
2013_09_28_1C_AQ_01_LM	1C_01	1N	1.76165	2.54191	1.16736	3.50068	3.28518	1.95076	5.0987	1.76765	7.37412	9.60674	8.106	4.37542	3.78838	4.2216	7.05949	5.34327	1.07498	1.19954	3.30397	3.39835	4.51155	3.35452	3.31538	34.0199	10.1033	1.59295	6.95643	4.74305	72.9499	32.3522	2.9147	2.42733	10.5901	2.63619	4.85306	6.71917	7.50325	4.73041	2.77835	27.5144	2.35351	96.4502	4.04854	3.11474	0.853591	5.8372	10.5733
2013_09_28_1C_AQ_02_LM	1C_02	1N	1.45065	2.69379	0.777248	3.09283	3.54546	2.22885	4.27997	2.12308	5.27538	7.70674	10.5051	3.64597	4.30679	3.37298	6.73695	4.82695	1.17509	0.533605	3.06905	2.36986	4.38814	3.25374	2.81894	26.6932	11.6383	1.69689	6.75106	4.8705	81.9723	35.1096	2.37441	2.17117	9.20785	2.78581	5.47968	7.41781	7.43117	4.39559	3.12165	28.1822	2.05246	83.5154	3.72548	2.52057	1.41236	4.64735	9.07022
2013_09_28_1C_AQ_03_LM	1C_03	1N	1.41227	3.08302	0.913656	3.75906	3.88273	1.85276	3.39442	2.38938	6.70262	9.17905	7.81753	4.04108	3.65638	4.21027	6.97844	6.32541	0.898522	1.06405	3.23988	2.76998	4.11651	3.55883	3.2117	33.9554	11.8051	1.91146	6.54087	4.9079	78.5791	37.6613	3.00799	2.895	9.66694	2.23267	6.61908	8.09432	9.11897	4.37371	3.36493	29.2026	2.19257	87.5316	3.56372	2.9298	0.867798	5.09265	8.37442
2013_09_28_3C_AQ_01_LM	3C_01	3N	1.45729	3.46237	0.977137	3.86088	4.85241	2.2644	4.29727	2.20447	6.56566	17.2838	15.5152	4.99173	5.86364	2.69429	5.23582	6.3175	1.95478	1.49077	3.56156	3.10738	2.24282	3.20985	5.4416	7.31216	13.0773	2.05517	3.26267	2.68256	71.2426	25.0121	2.7407	1.44103	13.9565	3.67777	6.36771	5.65573	2.26143	8.37241	4.85182	29.6175	3.14939	34.3674	6.23737	2.44698	0.809681	4.48316	4.09989
2013_09_28_3C_AQ_02_LM	3C_02	3N	2.09414	3.22097	1.01317	3.87823	4.08269	2.28436	4.50546	2.10992	6.34863	18.5261	15.0234	5.40359	4.87004	2.44785	5.29764	4.09991	1.76043	1.74656	2.72935	4.07516	2.6518	4.02738	5.96472	7.10866	14.9669	2.57864	3.74159	2.40485	73.1852	20.3409	3.20639	1.5117	11.9987	3.60112	7.23901	5.84214	2.33286	6.68069	4.69274	31.7888	3.47392	32.9578	7.13092	3.36539	1.08156	4.16592	3.86392
2013_09_28_3C_AQ_03_LM	3C_03	3N	1.48942	4.15427	0.886897	4.85439	4.50557	2.05612	5.11856	2.23214	7.62268	21.9334	17.7944	4.54246	4.95183	2.19937	10.9131	6.3558	2.28487	1.37291	3.1315	2.91896	2.93553	3.79814	6.48183	8.40506	17.5505	3.06766	4.58204	3.19851	83.1956	19.9072	2.82946	1.22097	14.535	3.26797	5.80437	5.25528	2.48051	5.46611	4.48405	35.7726	3.4355	38.7546	6.41862	2.77967	1.4218	5.20502	4.10813
2013_09_28_5C_AQ_01_LM	5C_01	6N	0.904614	1.13121	1.12882	5.06961	3.50412	1.25184	2.10349	1.08989	8.02275	11.5016	7.7364	3.45077	11.8323	2.16289	3.89882	2.91015	2.74923	0.728062	2.05029	1.43063	2.85188	2.8277	2.00008	41.5022	6.38971	1.66653	6.91673	2.84283	114.191	27.6818	2.72834	2.21919	6.64801	1.4515	7.01015	3.72537	4.83637	4.24758	2.3053	17.1783	1.55604	66.0313	3.03223	3.64925	1.6345	5.39437	5.55729
2013_09_28_5C_AQ_02_LM	5C_02	6N	1.06951	1.52634	1.00648	4.47222	3.95733	0.989242	2.0804	1.19198	7.79693	13.1085	8.23163	3.72121	5.46448	1.89327	4.08731	3.41312	2.25231	0.666196	2.032	1.01199	2.59774	2.9416	2.9018	39.9094	5.96768	1.35228	6.6865	3.12747	119.298	25.278	2.72845	1.99827	6.70681	1.42491	7.44454	3.39165	4.95126	3.81185	2.31274	19.1153	1.15351	63.1606	3.16583	3.96487	1.26544	3.50645	5.91323
2013_09_28_5C_AQ_03_LM	5C_03	6N	0.685815	1.7266	0.671848	4.36859	3.53099	1.14229	1.98842	0.796269	7.29836	11.973	7.26977	3.21332	10.4008	1.77746	3.93491	3.0722	2.29772	0.361139	2.21352	1.04282	2.69951	2.66817	2.07136	36.8935	5.8274	1.50788	6.09228	2.39557	115.817	29.0205	3.03709	2.35559	5.926	1.16972	8.06279	3.95598	5.0205	3.4625	2.43745	19.2702	1.13151	57.8756	3.25021	3.77918	1.33515	3.74759	5.78457
2013_09_28_2D_AQ_01_LM	2D_01	2T	3.87206	9.08608	3.98872	11.467	8.58861	9.63304	21.8738	3.66881	17.4811	22.5786	22.8923	8.89045	30.526	5.9488	13.1416	10.2973	6.6222	6.99319	14.435	7.01579	5.3928	6.20697	6.98531	70.9117	5.91831	11.7312	12.3922	6.13384	254.928	62.033	4.48378	15.4546	25.4023	4.92982	18.2786	7.23693	9.72128	8.01714	4.64026	28.6029	12.789	147.274	5.59334	8.41975	2.85496	9.67958	8.33035
2013_09_28_2D_AQ_02_LM	2D_02	2T	4.02497	9.27515	4.35712	11.7225	9.3715	8.56541	21.2156	3.46858	17.8633	21.3444	22.1578	8.54526	31.769	5.91049	8.96171	8.9349	6.62931	8.13277	15.2229	7.50692	5.17896	5.35928	3.62548	65.788	4.35292	11.7765	10.445	4.8496	268	58.9186	4.98734	13.7803	24.9641	4.66332	18.1985	6.02631	8.56001	7.94197	4.64019	26.2277	12.6944	130.657	6.05586	8.91252	3.18022	10.7576	7.28169
2013_09_28_2D_AQ_03_LM	2D_03	2T	4.00204	8.21202	3.54061	10.0369	7.69987	10.1599	22.2148	4.1785	17.2497	19.4125	21.6405	6.73316	28.9848	5.05674	12.1334	9.29833	6.14919	7.38572	14.4758	5.79745	4.8976	5.05322	6.18633	63.112	5.62649	11.005	10.7722	4.55633	243.991	64.6568	4.47213	14.0013	22.064	4.29414	18.2888	6.07463	7.85419	6.98246	4.4944	24.1729	11.3362	126.237	5.00709	8.82115	2.0688	8.66169	7.87241
2013_09_28_4D_AQ_01_LM	4D_01	4T	1.58527	3.44499	1.23126	4.1866	2.81047	2.54367	11.6345	2.42687	6.90713	8.00523	5.44644	2.54366	7.6426	1.23716	3.98656	2.23175	1.82048	3.73034	2.28539	3.77642	3.07243	1.34744	3.70908	46.8208	1.69109	2.39332	6.79158	3.07413	265.462	10.1553	3.80802	2.2296	11.0953	2.50775	19.6855	4.15557	6.62281	7.08674	2.55983	14.0102	9.6476	82.7856	4.6007	10.7991	2.80442	2.10007	5.54736
2013_09_28_4D_AQ_02_LM	4D_02	4T	1.76481	3.84207	1.39932	4.14711	2.7	1.90802	11.8083	2.23262	4.82922	8.37362	4.93277	2.45594	6.64083	1.32135	3.48024	1.90367	1.86654	3.27246	2.13539	3.67216	3.05277	1.64771	3.13851	42.2406	1.49784	2.12805	7.18825	3.04937	268.271	9.83224	3.7327	2.29462	10.8904	2.57486	20.3332	4.1603	6.49055	6.56806	2.46754	13.6147	8.5338	78.6933	4.38192	10.3928	2.96756	1.8578	4.08888
2013_09_28_4D_AQ_03_LM	4D_03	4T	1.81325	4.22689	1.49732	3.81589	2.33735	1.94939	11.6168	2.41599	4.3721	8.35684	4.90818	2.1987	6.38207	1.2695	3.41786	1.99628	1.36965	2.83971	2.08975	3.48819	3.43087	1.43914	3.85416	40.8173	2.13671	2.15254	6.10899	3.03119	261.988	12.7053	3.98062	2.6212	11.2964	2.5122	19.355	4.36745	6.66535	6.50353	2.46608	12.2543	9.33779	72.9805	4.21169	10.1821	3.30433	2.30787	4.50444
2013_09_28_6D_AQ_01_LM	6D_01	5T	2.63945	6.31775	2.91666	6.37613	4.66686	4.68346	20.0229	1.97916	6.43749	13.7868	7.96044	4.03121	17.5278	1.88721	7.00099	2.92973	3.81895	6.29657	6.11687	7.30137	4.65804	2.66803	5.36503	65.5067	1.71105	2.35071	11.3826	4.13972	308.288	24.2555	4.08662	4.95317	19.9878	4.73922	22.8342	6.18227	10.1817	7.27273	2.61724	16.5523	16.9773	149.313	4.38238	11.5104	3.72462	5.55342	7.05914
2013_09_28_6D_AQ_02_LM	6D_02	5T	2.50073	5.26342	2.43446	6.31737	4.48565	3.8335	17.9708	2.26808	6.41204	12.7155	7.39245	4.19408	16.4222	2.69478	6.89217	2.81165	3.62385	6.31802	5.74726	7.2865	4.46888	2.45667	4.83161	70.4271	1.89502	2.10873	11.263	4.86598	293.773	23	3.85507	4.38402	19.916	4.78875	21.1974	5.40138	9.7056	6.96409	2.47445	15.8701	16.31	148.344	3.94266	11.1303	3.21151	5.09864	6.91699
2013_09_28_6D_AQ_03_LM	6D_03	5T	2.29994	5.62289	2.64762	6.19328	3.8399	3.87048	17.83	2.31859	6.32925	11.6225	7.59966	3.93303	16.6424	2.48552	7.24621	2.82363	4.10596	5.86452	5.97232	6.13951	4.40639	2.4036	5.87712	65.9444	1.47006	2.55503	10.1381	4.43604	290.964	25.9553	3.11229	4.62227	19.8918	4.62395	21.5752	6.01756	9.52045	6.02925	2.51891	16.6978	16.2258	144.966	4.43111	11.2625	3.83008	5.25446	6.50875
2013_09_28_QC_AQ_01_LM	QC_01	QC	2.49998	5.6872	1.64754	6.81754	4.51837	3.67439	16.5306	2.46999	8.78084	12.9501	10.5704	5.20596	16.784	2.66553	5.4647	2.54347	4.06392	2.37247	4.93464	4.4252	4.42661	3.76383	4.328	57.5577	5.43066	2.93114	8.88279	3.90363	267.397	14.6156	3.70729	1.71803	8.63165	2.97249	19.7485	6.33644	7.45149	8.26214	3.86113	24.1707	7.61905	128.581	5.48469	9.74594	2.94608	3.64139	6.32013
2013_09_28_QC_AQ_02_LM	QC_02	QC	3.01379	6.7725	2.34677	6.36397	4.93637	3.84017	16.139	2.605	9.52395	11.3403	11.7083	5.04747	15.4772	2.59512	5.73629	3.50881	3.22707	2.18647	4.84041	5.14421	3.65084	4.01548	4.97583	53.2184	5.46508	3.62795	8.74055	3.89914	255.097	27.8758	3.7218	2.55585	9.41135	2.85303	18.5301	5.82581	8.05311	7.97134	3.37344	21.5645	7.90274	118.282	5.84935	9.17399	3.24501	4.28436	6.17033
2013_09_28_QC_AQ_03_LM	QC_03	QC	2.48952	6.0283	2.31489	5.67653	4.80611	3.62224	16.4986	2.1079	8.53845	11.2724	9.85211	4.963	15.612	2.64773	5.50863	2.59491	3.81287	1.97339	4.49054	3.88448	3.27514	3.19462	4.33213	52.2056	4.32514	3.06985	8.25448	4.11108	269.919	21.1263	3.57422	2.28232	7.67633	2.76497	17.2377	5.39085	6.84956	7.58249	4.43694	22.9951	7.9295	115.585	5.28043	9.33198	2.92457	3.09642	6.1746
2013_09_28_QC_AQ_04_LM	QC_04	QC	2.57855	6.05731	2.39247	6.03814	4.65191	3.02558	15.8787	2.3045	8.25574	12.0778	8.67714	3.8747	14.2768	2.70005	5.01282	4.56515	3.60078	2.12939	4.83392	3.88804	3.46608	3.11189	4.47018	49.0886	4.41282	2.87541	8.02265	3.42637	264.306	26.4535	3.83605	2.34888	7.58431	3.12608	16.8787	5.64835	6.81949	7.00771	3.42974	21.3863	7.37409	103.169	4.59523	9.73607	2.83022	3.77404	6.83226
[truncated: 599 more columns]
